# Supplementary material
Source: publisher figshare collection journal article supplement (https://frontiersin.figshare.com/ndownloader/files/13469762)
Supplement: Supplementary file [file 13469762]

## Supplementary Material

# Catch crop residues stimulate N<sub>2</sub>O emissions during spring, without affecting the genetic potential for nitrite and N<sub>2</sub>O reduction

Yun-Feng Duan <sup>1</sup>, Sara Hallin <sup>2</sup>, Christopher M. Jones <sup>2</sup>, Anders Priemé <sup>3</sup>, Rodrigo Labouriau <sup>4</sup>, Søren O. Petersen <sup>1</sup>

1. Department of Agroecology, Aarhus University, Tjele, Denmark
2. Department of Forest Mycology and Plant Pathology, Swedish University of Agricultural Sciences, Uppsala, Sweden
3. Section of Microbiology, Department of Biology, University of Copenhagen, Copenhagen, Denmark
4. Department of Mathematics, Aarhus University, Aarhus, Denmark

### Correspondence to:

Søren O. Petersen

sop@agro.au.dk

## Alignment of terminal restriction fragments (T-RFs) using R package *fragalign*

T-RFs derived from soil samples in the present study were aligned using an in-house R package *fragalign*. The principals involved in the alignment algorithm are described in the manuscript. Here, we list the parameters used in the analysis in the present study. The R source code of the package can be downloaded as a separate file.

### Parameters:

```
color = "B"           # Fragment color.
frag.min = 50          # Minimum fragment size.
frag.max = 700         # Maximum fragment size.
noise.SD = 3           # Threshold for detecting noise peaks; default is 3, reduce to include more peaks.
norm = "h"            # Noise filtering option; h = filter noise based on peak height; a = filter based on peak area.
gaussR = 1.5           # Gaussian peak contrasts; blurs peaks - for PeakScanner, should be 1-3; GeneMapper should be 30-35.
merge.a = 0.04         # Merging parameter a - most useful for merging peaks with shoulders, increase to increase merging -
                      # set to 0 to turn off merging; default is 0.04 from Vähamää et al., 2007.
merge.b = 0.6          # Merging parameter b - default from Vähamää.
merge.c = 3.5          # Merging parameter c - default from Vähamää.
e = 0.05              # Alignment parameter e - default from Vähamää is 0.013; increase to allow greater range of fragments
                      # to be matched.
f = 0.8               # Alignment parameter f - default from Vähamää is 1.
g = 3.5               # Alignment parameter g - default from Vähamää is 3.5; absolute allowable size to be matched in bp.
min.n = 2             # Minimum number of fragments to keep sample - otherwise tossed.

# Call the fragment alignment function
out <- fragalign(fileName, color, frag.min, frag.max, noise.SD, norm, gaussR, merge.a, merge.b, merge.c, e, f, g, min.n)
```

**Table S1.** Primers and thermal cycling conditions for quantitative amplification of denitrifier genes.

| Gene                 | Primers                                                              | Thermal cycling conditions for qPCR                                                                                                                                                                                                                   | Reference                  |
|----------------------|----------------------------------------------------------------------|-------------------------------------------------------------------------------------------------------------------------------------------------------------------------------------------------------------------------------------------------------|----------------------------|
| <i>nirK</i>          | F1aCu: ATCAT GGTSC TGCCG CG<br>R3Cu: GCCTC GATCA GRTR TGGTT          | Initial denaturation at 95 °C for 10 min; 5 cycles of 95°C for 15 sec, 63°C for 30 sec (decreased by 1°C per cycle), and 72°C for 30 sec; 40 cycles of 95°C for 15 sec, 58°C for 30 sec, 72°C for 30 sec, 83°C for 15 sec, followed by plate reading. | Hallin and Lindgren (1999) |
| <i>nirS</i>          | Cd3aF: AACGY SAAGG ARACS GG<br>R3cd: GASTT CCGRT GSGTC TTSA GAA      | Initial denaturation at 95 °C for 10 min; 5 cycles of 95°C for 15 sec, 65°C for 30 sec (decreased by 1°C per cycle), 72°C for 30 sec; 40 cycles of 95°C for 15 sec, 60°C for 30 sec, 72°C for 30 sec, 83°C for 15 sec, followed by plate reading.     | Throbäck et al. (2004)     |
| <i>nosZ</i> Clade I  | nosZ_1F: CGYTG TTCMT CGACA GCCAG<br>nosZ_1R: CGSAC CTTST TGCCS TYGCG | Initial denaturation at 95 °C for 10 min; 5 cycles of 95°C for 15 sec, 65°C for 30 sec (decreased by 1°C per cycle), 72°C for 30 sec; 40 cycles of 95°C for 15 sec, 60°C for 30 sec, 72°C for 30 sec, 83°C for 15 sec, followed by plate reading.     | Henry et al. (2006)        |
| <i>nosZ</i> Clade II | nosZ-II_F: CTXGG XCCXY TKCAY AC<br>nosZ-II_R: GCXGA RCARA AXTCB GTRC | Initial denaturation at 95 °C for 10 min; 40 cycles of 95°C for 30 sec, 54°C for 60 sec, 72°C for 60 sec, 82°C for 15 sec, followed by plate reading.                                                                                                 | Jones et al. (2013)        |

## References

- Hallin, S., and Lindgren, P.-E. (1999). PCR Detection of Genes Encoding Nitrite Reductase in Denitrifying Bacteria. *Applied and Environmental Microbiology* 65(4), 1652-1657.
- Henry, S., Bru, D., Stres, B., Hallet, S., and Philippot, L. (2006). Quantitative detection of the *nosZ* gene, encoding nitrous oxide reductase, and comparison of the abundances of 16S rRNA, *narG*, *nirK*, and *nosZ* genes in soils. *Applied and Environmental Microbiology* 72(8), 5181-5189. doi: 10.1128/aem.00231-06.
- Jones, C.M., Graf, D.R.H., Bru, D., Philippot, L., and Hallin, S. (2013). The unaccounted yet abundant nitrous oxide-reducing microbial community: A potential nitrous oxide sink. *The ISME Journal* 7(2), 417-426. doi: 10.1038/ismej.2012.125.
- Léon, J. (1992). Crop Growth Rates and Durations of Spring Barley Cultivars as Affected by Varied N Supply and Seeding Rates. *Journal of Agronomy and Crop Science* 169(1-2), 1-8. doi: doi:10.1111/j.1439-037X.1992.tb01179.x.
- Throbäck, I.N., Enwall, K., Jarvis, Å., and Hallin, S. (2004). Reassessing PCR primers targeting *nirS*, *nirK* and *nosZ* genes for community surveys of denitrifying bacteria with DGGE. *FEMS Microbiology Ecology* 49(3), 401-417. doi: 10.1016/j.femsec.2004.04.011.

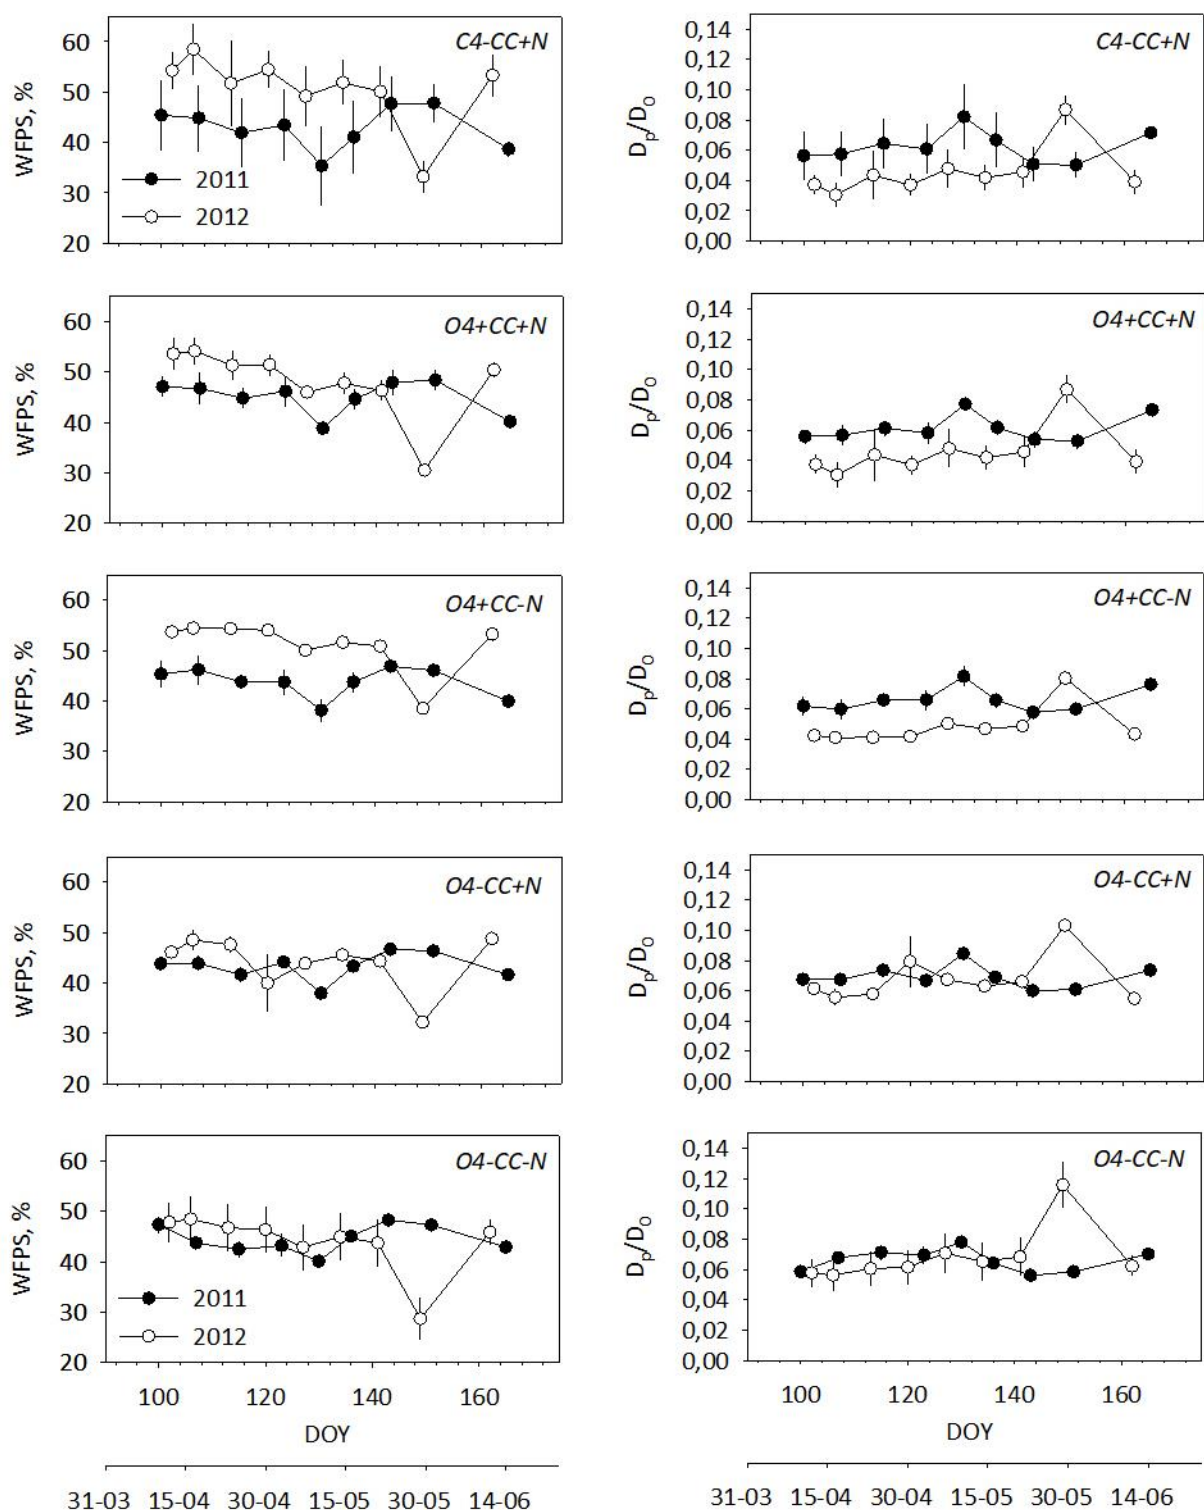

**Figure S1.** Soil water-filled pore space (WFPS) and relative soil gas diffusivity ( $D_p/D_0$ ), as defined by Moldrup et al. (2005).

Moldrup, P., Olesen, T., Yoshikawa, S., Komatsu, T., and Rolston, D.E. (2005). Predictive-descriptive models for gas and solute diffusion coefficients in variably saturated porous media coupled to pore-size distribution: II. Gas diffusivity in undisturbed soil. *Soil Science* 170(11), 854-866. doi: 10.1097/01.ss.0000196768.44165.1f.

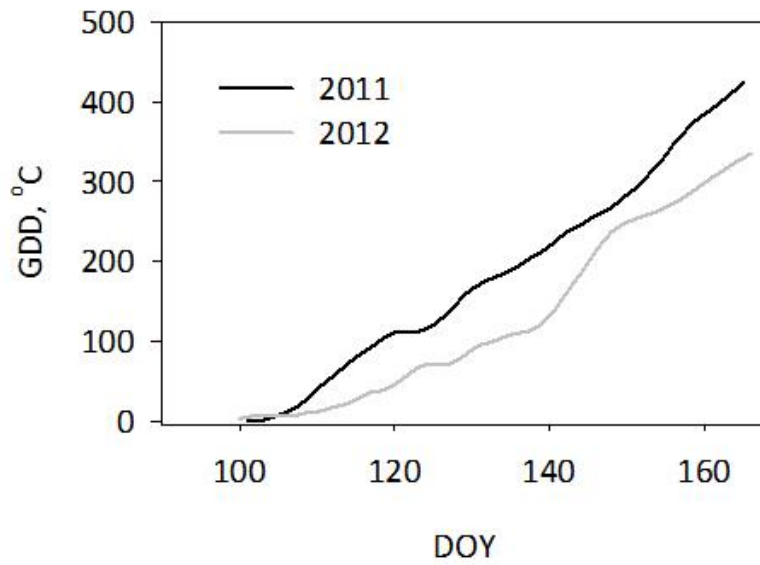

**Figure S2.** Growing degree days, GDD, calculated as:  $GDD = \sum \max[T_d, T_{base}] - T_{base}$ , where  $T_d$  is daily average temperature and  $T_{base}$  is a base temperature of 5°C (Léon, 1992).

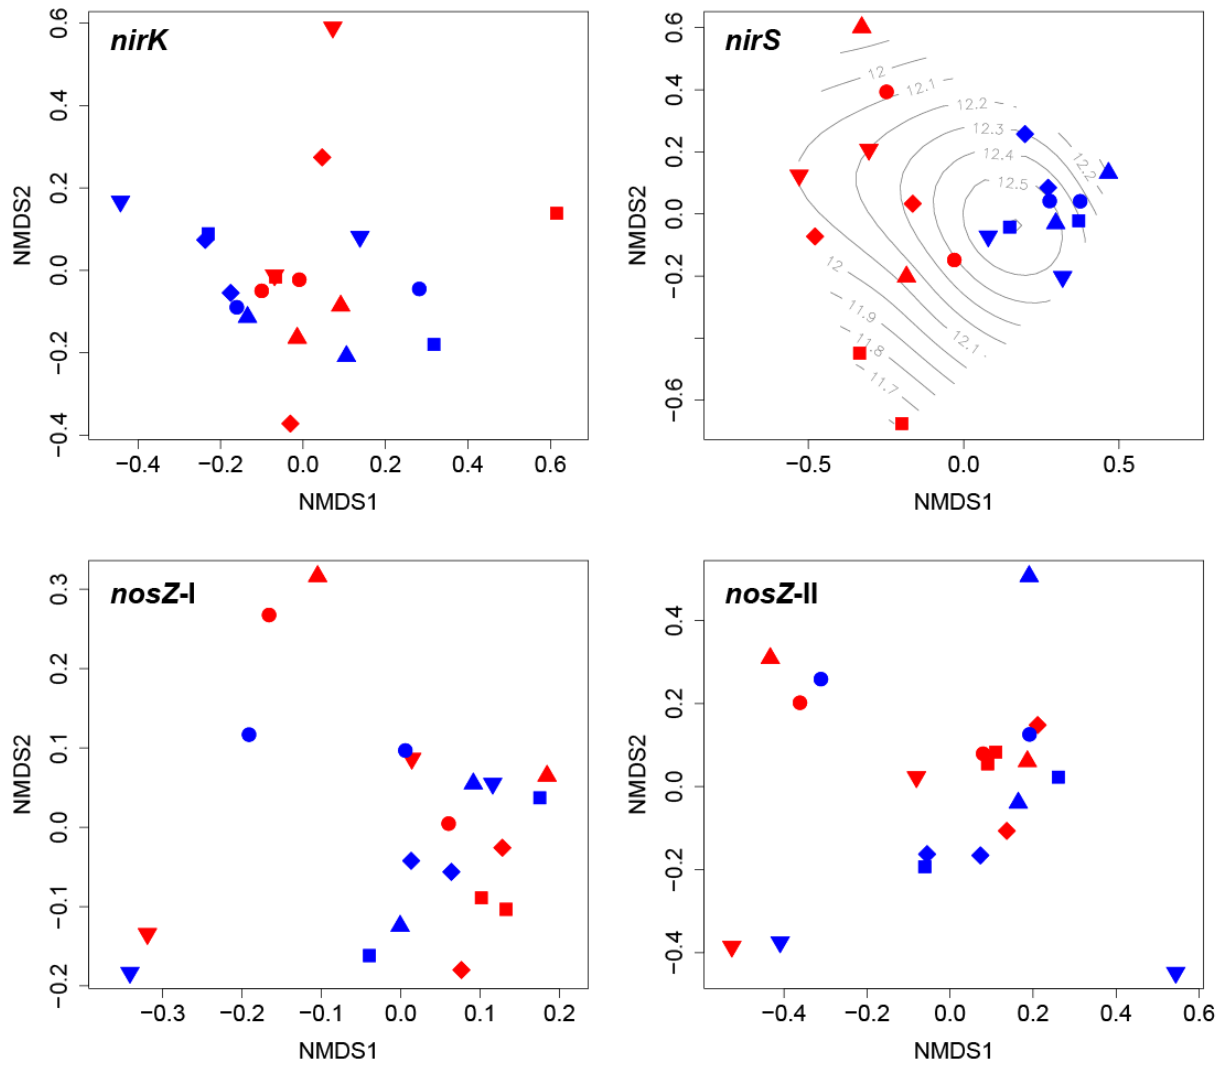

**Figure S3:** Non-metric multi-dimensional scaling (NMDS) ordination of T-RFLP profiles for *nirK*, *nirS*, *nosZ-I*, and *nosZ-II* genes. Each point represents the T-RFLP profile of one replicate plot. Average soil  $\text{NO}_3^-$  concentrations (mg N kg<sup>-1</sup> soil) are fitted to the ordination of *nirS* genes ( $p < 0.05$ ) and presented as gradients. ●: C4-CC+N; ■: O4-CC-N; ◆: O4-CC+N; ▲: O4+CC-N; ▼: O4+CC+N. Red points represent samples from 2011, and blue points those from 2012.
